# Supplementary figures and images for: Effects of Different Amounts of Corn Silk Polysaccharide on the Structure and Function of Peanut Protein Isolate Glycosylation Products
Source: MDPI journal article supplement (doi:10.3390/foods11152214), 2022-07-26

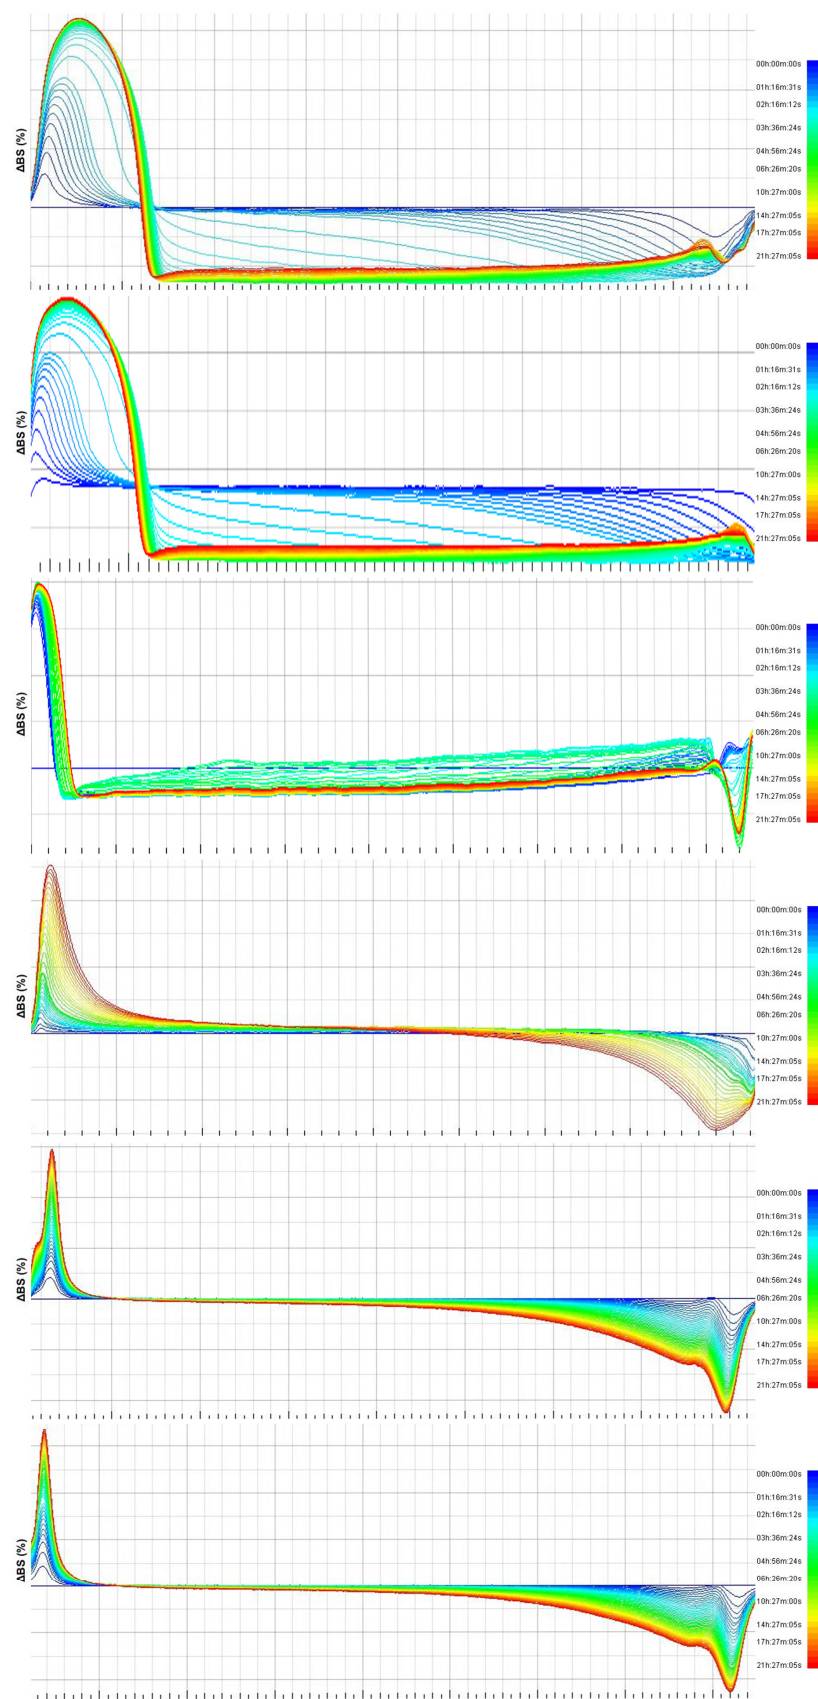

**Figure S1.** Delta backscattering profiles of PPI-CSP complexes aqueous solutions.

Supplement: s1 [file s1]
